# Supplementary material
Source: PubMed Central journal article supplement (PMC4193950)
Supplement: NIHMS573125-supplement-supplement_1.pdf [file NIHMS573125-supplement-supplement_1.pdf]

# SUPPLEMENTARY DATA

## Mouse ZIP8 and ZIP14 Divalent Cation/Bicarbonate Symporters: Tissue-Specific Innate Response to Inflammatory Stimuli

Marina Gálvez-Peralta<sup>1</sup>, Zhifang Wang<sup>1</sup>, Shengying Bao<sup>2</sup>,

Daren L Knoell<sup>2</sup>, and Daniel W Nebert<sup>1,\*</sup>

<sup>1</sup>*Department of Environmental Health, and Center for Environmental Genetics (CEG)  
University of Cincinnati Medical Center, Cincinnati, Ohio 45267-0056*

<sup>2</sup>*Ohio State Univ David Heart and Lung Research Institute (Columbus), OH 43210, USA*

\*Correspondence should be addressed to: [dan.nebert@uc.edu](mailto:dan.nebert@uc.edu)

Table S1. Effect of LPS, TNF or IL6 on mRNA levels as a function of time

Part A: *P*-values from Figs. 1A & 2A data (LPS treatment)

| Hours           | 2      | 4      | 8     | 16     | 32    |               | 2      | 4      | 8      | 16    | 32    |               | 2      | 4      | 8      | 16    | 32    |       |
|-----------------|--------|--------|-------|--------|-------|---------------|--------|--------|--------|-------|-------|---------------|--------|--------|--------|-------|-------|-------|
| <b>Liver</b>    |        |        |       |        |       | <b>PSI</b>    |        |        |        |       |       | <b>Kidney</b> |        |        |        |       |       |       |
| ZIP8            | NS     | NS     | NS    | 0.004  | NS    |               | ZIP8   | NS     | NS     | NS    | NS    |               | ZIP8   | NS     | NS     | NS    | NS    |       |
| ZIP14A          | NS     | NS     | NS    | <0.001 | 0.049 |               | ZIP14A | NS     | NS     | NS    | NS    |               | ZIP14A | NS     | NS     | NS    | NS    |       |
| ZIP14B          | NS     | NS     | NS    | 0.019  | NS    |               | ZIP14B | NS     | NS     | NS    | NS    |               | ZIP14B | NS     | NS     | NS    | NS    |       |
| TNF             | NS     | NS     | NS    | NS     | NS    |               | TNF    | 0.007  | 0.016  | 0.010 | 0.009 | 0.008         |        | TNF    | NS     | NS    | NS    | NS    |
| IL6             | NS     | NS     | NS    | NS     | NS    |               | IL6    | 0.005  | 0.019  | NS    | 0.032 | 0.050         |        | IL6    | 0.002  | 0.034 | NS    | NS    |
| IL1B            | NS     | NS     | NS    | NS     | NS    |               | IL1B   | 0.017  | 0.035  | NS    | NS    | 0.026         |        | IL1B   | NS     | NS    | NS    | NS    |
| <b>Lung</b>     |        |        |       |        |       | <b>Heart</b>  |        |        |        |       |       | <b>Brain</b>  |        |        |        |       |       |       |
| ZIP8            | NS     | NS     | NS    | NS     | NS    |               | ZIP8   | NS     | NS     | NS    | NS    | 0.013         |        | ZIP8   | NS     | 0.016 | NS    | NS    |
| ZIP14A          | NS     | NS     | NS    | NS     | NS    |               | ZIP14A | NS     | NS     | 0.027 | NS    | NS            |        | ZIP14A | NS     | NS    | NS    | NS    |
| ZIP14B          | NS     | NS     | NS    | 0.010  | NS    |               | ZIP14B | NS     | NS     | NS    | NS    | NS            |        | ZIP14B | NS     | NS    | NS    | NS    |
| TNF             | <0.001 | NS     | NS    | NS     | NS    |               | TNF    | NS     | NS     | NS    | NS    | NS            |        | TNF    | 0.008  | 0.007 | 0.013 | 0.018 |
| IL6             | <0.001 | <0.001 | NS    | NS     | NS    |               | IL6    | 0.002  | 0.002  | NS    | NS    | NS            |        | IL6    | <0.001 | NS    | NS    | NS    |
| IL1B            | 0.005  | NS     | NS    | NS     | NS    |               | IL1B   | NS     | NS     | NS    | NS    | NS            |        | IL1B   | 0.011  | 0.013 | 0.034 | NS    |
| <b>Pancreas</b> |        |        |       |        |       | <b>Spleen</b> |        |        |        |       |       | <b>Testis</b> |        |        |        |       |       |       |
| ZIP8            | NS     | NS     | NS    | NS     | NS    |               | ZIP8   | NS     | NS     | NS    | 0.028 | NS            |        | ZIP8   | NS     | NS    | NS    | NS    |
| ZIP14A          | NS     | NS     | NS    | NS     | NS    |               | ZIP14A | NS     | 0.049  | NS    | NS    | <0.001        |        | ZIP14A | NS     | NS    | NS    | NS    |
| ZIP14B          | NS     | NS     | NS    | NS     | NS    |               | ZIP14B | NS     | 0.015  | 0.046 | 0.024 | NS            |        | ZIP14B | NS     | NS    | NS    | NS    |
| TNF             | NS     | NS     | NS    | NS     | NS    |               | TNF    | 0.004  | 0.007  | NS    | NS    | NS            |        | TNF    | 0.003  | 0.002 | NS    | NS    |
| IL6             | NS     | NS     | NS    | NS     | 0.030 |               | IL6    | <0.001 | <0.001 | 0.026 | 0.035 | NS            |        | IL6    | 0.003  | 0.009 | 0.032 | 0.041 |
| IL1B            | NS     | NS     | NS    | NS     | 0.028 |               | IL1B   | 0.029  | 0.014  | NS    | NS    | NS            |        | IL1B   | 0.007  | NS    | NS    | NS    |
| <b>Bladder</b>  |        |        |       |        |       | <b>Skin</b>   |        |        |        |       |       | <b>PGD</b>    |        |        |        |       |       |       |
| ZIP8            | 0.001  | NS     | NS    | 0.002  | NS    |               | ZIP8   | NS     | NS     | NS    | NS    | NS            |        | ZIP8   | NS     | NS    | NS    | NS    |
| ZIP14A          | 0.022  | 0.028  | NS    | 0.022  | NS    |               | ZIP14A | NS     | 0.003  | 0.004 | 0.019 | NS            |        | ZIP14A | NS     | NS    | NS    | NS    |
| ZIP14B          | NS     | NS     | NS    | NS     | NS    |               | ZIP14B | NS     | NS     | NS    | NS    | NS            |        | ZIP14B | 0.029  | 0.011 | 0.022 | 0.030 |
| TNF             | 0.004  | NS     | NS    | NS     | NS    |               | TNF    | NS     | NS     | NS    | NS    | NS            |        | TNF    | 0.022  | NS    | NS    | NS    |
| IL6             | <0.001 | 0.004  | 0.005 | NS     | NS    |               | IL6    | 0.039  | 0.018  | NS    | NS    | NS            |        | IL6    | <0.001 | NS    | NS    | NS    |
| IL1B            | 0.002  | 0.010  | 0.034 | 0.045  | NS    |               | IL1B   | NS     | NS     | NS    | NS    | NS            |        | IL1B   | 0.011  | NS    | NS    | NS    |

## Part B: P-values from Figs. 1B &amp; 2B data (TNF treatment)

| Hours           | 2     | 4     | 8     | 16    | 32    |               | 2      | 4     | 8     | 16    | 32    |               | 2 | 4      | 8     | 16     | 32    |    |    |
|-----------------|-------|-------|-------|-------|-------|---------------|--------|-------|-------|-------|-------|---------------|---|--------|-------|--------|-------|----|----|
| <b>Liver</b>    |       |       |       |       |       | <b>PSI</b>    |        |       |       |       |       | <b>Kidney</b> |   |        |       |        |       |    |    |
| ZIP8            | NS    | NS    | NS    | NS    | NS    |               | ZIP8   | NS    | NS    | NS    | NS    | NS            |   | ZIP8   | 0.017 | 0.015  | 0.042 | NS | NS |
| ZIP14A          | NS    | NS    | NS    | NS    | NS    |               | ZIP14A | NS    | NS    | NS    | NS    | NS            |   | ZIP14A | NS    | NS     | NS    | NS | NS |
| ZIP14B          | NS    | NS    | NS    | NS    | NS    |               | ZIP14B | NS    | NS    | NS    | NS    | NS            |   | ZIP14B | NS    | 0.002  | NS    | NS | NS |
| TNF             | NS    | 0.032 | NS    | NS    | NS    |               | TNF    | NS    | 0.024 | NS    | 0.015 | NS            |   | TNF    | NS    | NS     | 0.018 | NS | NS |
| IL6             | 0.018 | NS    | NS    | NS    | NS    |               | IL6    | 0.004 | 0.007 | NS    | NS    | NS            |   | IL6    | NS    | 0.015  | NS    | NS | NS |
| IL1B            | NS    | NS    | NS    | NS    | NS    |               | IL1B   | NS    | NS    | NS    | NS    | NS            |   | IL1B   | NS    | NS     | NS    | NS | NS |
| <b>Lung</b>     |       |       |       |       |       | <b>Heart</b>  |        |       |       |       |       | <b>Brain</b>  |   |        |       |        |       |    |    |
| ZIP8            | NS    | NS    | NS    | NS    | NS    |               | ZIP8   | NS    | NS    | NS    | NS    | NS            |   | ZIP8   | NS    | 0.008  | 0.001 | NS | NS |
| ZIP14A          | NS    | NS    | NS    | NS    | NS    |               | ZIP14A | NS    | NS    | NS    | NS    | NS            |   | ZIP14A | NS    | NS     | 0.034 | NS | NS |
| ZIP14B          | NS    | NS    | NS    | NS    | NS    |               | ZIP14B | NS    | NS    | 0.039 | 0.004 | NS            |   | ZIP14B | NS    | NS     | NS    | NS | NS |
| TNF             | NS    | NS    | NS    | NS    | NS    |               | TNF    | NS    | NS    | NS    | NS    | NS            |   | TNF    | NS    | NS     | NS    | NS | NS |
| IL6             | 0.015 | NS    | NS    | NS    | 0.012 |               | IL6    | NS    | NS    | 0.011 | NS    | NS            |   | IL6    | NS    | NS     | NS    | NS | NS |
| IL1B            | NS    | NS    | NS    | NS    | 0.004 |               | IL1B   | NS    | NS    | NS    | NS    | NS            |   | IL1B   | NS    | NS     | 0.006 | NS | NS |
| <b>Pancreas</b> |       |       |       |       |       | <b>Spleen</b> |        |       |       |       |       | <b>Testis</b> |   |        |       |        |       |    |    |
| ZIP8            | NS    | 0.020 | 0.002 | 0.009 | NS    |               | ZIP8   | NS    | NS    | NS    | NS    | NS            |   | ZIP8   | NS    | NS     | NS    | NS | NS |
| ZIP14A          | NS    | NS    | NS    | NS    | NS    |               | ZIP14A | NS    | NS    | NS    | NS    | NS            |   | ZIP14A | NS    | NS     | NS    | NS | NS |
| ZIP14B          | NS    | NS    | NS    | 0.017 | NS    |               | ZIP14B | NS    | NS    | NS    | NS    | NS            |   | ZIP14B | NS    | NS     | NS    | NS | NS |
| TNF             | NS    | NS    | 0.031 | 0.028 | NS    |               | TNF    | NS    | NS    | NS    | NS    | NS            |   | TNF    | NS    | NS     | NS    | NS | NS |
| IL6             | NS    | NS    | 0.020 | 0.013 | NS    |               | IL6    | 0.036 | 0.041 | NS    | NS    | NS            |   | IL6    | NS    | NS     | NS    | NS | NS |
| IL1B            | 0.008 | NS    | 0.007 | 0.012 | NS    |               | IL1B   | NS    | NS    | NS    | NS    | NS            |   | IL1B   | NS    | NS     | NS    | NS | NS |
| <b>Bladder</b>  |       |       |       |       |       | <b>Skin</b>   |        |       |       |       |       | <b>PGD</b>    |   |        |       |        |       |    |    |
| ZIP8            | NS    | NS    | NS    | NS    | NS    |               | ZIP8   | NS    | NS    | NS    | NS    | NS            |   | ZIP8   | 0.011 | NS     | NS    | NS | NS |
| ZIP14A          | NS    | NS    | NS    | NS    | NS    |               | ZIP14A | 0.002 | 0.033 | 0.042 | NS    | NS            |   | ZIP14A | NS    | NS     | NS    | NS | NS |
| ZIP14B          | NS    | NS    | NS    | NS    | NS    |               | ZIP14B | 0.003 | 0.019 | 0.018 | NS    | NS            |   | ZIP14B | NS    | NS     | NS    | NS | NS |
| TNF             | NS    | NS    | NS    | NS    | NS    |               | TNF    | NS    | NS    | NS    | NS    | NS            |   | TNF    | NS    | 0.004  | 0.002 | NS | NS |
| IL6             | 0.031 | NS    | NS    | NS    | NS    |               | IL6    | 0.030 | NS    | NS    | NS    | NS            |   | IL6    | NS    | <0.001 | 0.001 | NS | NS |
| IL1B            | 0.039 | NS    | NS    | NS    | NS    |               | IL1B   | 0.014 | NS    | NS    | NS    | NS            |   | IL1B   | NS    | NS     | NS    | NS | NS |

**Part C: P-values from Figs. 1C & 2C data (IL6 treatment)**

| Hours           | 2     | 4     | 8     | 16    |               |        | 2     | 4     | 8     | 16            |  |        | 2     | 4     | 8     | 16    |
|-----------------|-------|-------|-------|-------|---------------|--------|-------|-------|-------|---------------|--|--------|-------|-------|-------|-------|
| <b>Liver</b>    |       |       |       |       | <b>PSI</b>    |        |       |       |       | <b>Kidney</b> |  |        |       |       |       |       |
| ZIP8            | NS    | NS    | 0.011 | NS    |               | ZIP8   | NS    | NS    | NS    | NS            |  | ZIP8   | NS    | NS    | NS    | NS    |
| ZIP14A          | NS    | NS    | NS    | 0.040 |               | ZIP14A | NS    | NS    | NS    | NS            |  | ZIP14A | NS    | NS    | NS    | NS    |
| ZIP14B          | NS    | NS    | NS    | 0.003 |               | ZIP14B | NS    | NS    | NS    | NS            |  | ZIP14B | NS    | NS    | NS    | NS    |
| TNF             | NS    | NS    | NS    | NS    |               | TNF    | NS    | NS    | NS    | NS            |  | TNF    | NS    | NS    | NS    | NS    |
| IL6             | NS    | NS    | NS    | NS    |               | IL6    | 0.025 | NS    | NS    | NS            |  | IL6    | 0.010 | 0.008 | 0.025 | 0.015 |
| IL1B            | NS    | NS    | 0.042 | NS    |               | IL1B   | NS    | NS    | 0.013 | NS            |  | IL1B   | 0.014 | 0.019 | 0.019 | 0.028 |
| <b>Lung</b>     |       |       |       |       | <b>Heart</b>  |        |       |       |       | <b>Brain</b>  |  |        |       |       |       |       |
| ZIP8            | NS    | NS    | 0.028 | 0.040 |               | ZIP8   | NS    | NS    | NS    | NS            |  | ZIP8   | NS    | 0.027 | 0.028 | NS    |
| ZIP14A          | NS    | NS    | NS    | 0.012 |               | ZIP14A | NS    | NS    | NS    | 0.048         |  | ZIP14A | NS    | NS    | NS    | NS    |
| ZIP14B          | NS    | NS    | NS    | NS    |               | ZIP14B | NS    | NS    | NS    | 0.038         |  | ZIP14B | NS    | NS    | NS    | NS    |
| TNF             | NS    | NS    | NS    | NS    |               | TNF    | NS    | NS    | NS    | NS            |  | TNF    | NS    | NS    | NS    | NS    |
| IL6             | NS    | NS    | NS    | NS    |               | IL6    | NS    | NS    | NS    | NS            |  | IL6    | NS    | NS    | NS    | NS    |
| IL1B            | NS    | NS    | 0.005 | NS    |               | IL1B   | 0.011 | NS    | NS    | 0.020         |  | IL1B   | NS    | NS    | NS    | NS    |
| <b>Pancreas</b> |       |       |       |       | <b>Spleen</b> |        |       |       |       | <b>Testis</b> |  |        |       |       |       |       |
| ZIP8            | NS    | NS    | NS    | NS    |               | ZIP8   | NS    | NS    | NS    | NS            |  | ZIP8   | NS    | NS    | NS    | NS    |
| ZIP14A          | NS    | NS    | NS    | NS    |               | ZIP14A | NS    | NS    | NS    | NS            |  | ZIP14A | NS    | NS    | NS    | NS    |
| ZIP14B          | NS    | NS    | NS    | NS    |               | ZIP14B | NS    | NS    | NS    | NS            |  | ZIP14B | NS    | 0.008 | NS    | NS    |
| TNF             | NS    | NS    | NS    | NS    |               | TNF    | NS    | NS    | NS    | NS            |  | TNF    | NS    | NS    | NS    | NS    |
| IL6             | NS    | NS    | NS    | NS    |               | IL6    | NS    | NS    | NS    | NS            |  | IL6    | NS    | NS    | NS    | NS    |
| IL1B            | 0.009 | 0.016 | 0.015 | NS    |               | IL1B   | NS    | NS    | NS    | NS            |  | IL1B   | NS    | NS    | NS    | NS    |
| <b>Bladder</b>  |       |       |       |       | <b>Skin</b>   |        |       |       |       | <b>PGD</b>    |  |        |       |       |       |       |
| ZIP8            | NS    | NS    | 0.006 | NS    |               | ZIP8   | NS    | NS    | NS    | NS            |  | ZIP8   | NS    | NS    | NS    | NS    |
| ZIP14A          | NS    | NS    | NS    | NS    |               | ZIP14A | NS    | NS    | NS    | NS            |  | ZIP14A | NS    | NS    | NS    | NS    |
| ZIP14B          | NS    | NS    | 0.050 | NS    |               | ZIP14B | NS    | NS    | NS    | NS            |  | ZIP14B | NS    | NS    | NS    | NS    |
| TNF             | NS    | NS    | NS    | NS    |               | TNF    | NS    | NS    | NS    | NS            |  | TNF    | NS    | NS    | NS    | NS    |
| IL6             | NS    | NS    | NS    | NS    |               | IL6    | NS    | 0.044 | NS    | NS            |  | IL6    | NS    | NS    | NS    | NS    |
| IL1B            | 0.016 | NS    | NS    | NS    |               | IL1B   | NS    | NS    | NS    | NS            |  | IL1B   | NS    | NS    | NS    | NS    |
